# Supplementary material for: Harnessing embryogenic cell suspension culture for Agrobacterium-mediated transformation of microvine
Source: Research Square preprint supplement (doi:10.21203/rs.3.rs-7661205/v1), 2025-09-26
Supplement: Supplementary file 1 [file 0f73b3daa508511c66f5554b.xlsx]

## Sheet: Table S1
	Table S1: List of primers used for VviUbi7 promoter amplification, sequence validation and ddPCR
	No.	Primer name	Primer sequence 5’-3’	Notes	Amplicon size
	1	VviUbi7p_For	ATGAAGACTAGGAGAAGGTTTGACATTATTTGAAAGCTAT
	2	VviUbi7p_Rev	ATGAAGACTACATTCTGTTTCAATTGAAAAACCACAAAGATCAGG
	3	Sequencing_For	CGGAAGAGCGCCCAATACGC
	4	Sequencing_Rev	CCATTATTATCATGACATTAACC
	5	VviCHI_For1	TTTCCCCTGAAGCGAAGAAG	ddPCR	130 bp
	6	VviCHI_Rev	CCATCTCTCCTTCAACCACC	ddPCR
	7	VviCHI_ probe_FAM	AGCTTCAATTTTCTCATCCCCAGCC	ddPCR
	8	NPTII_For2	ACGTTGTCACTGAAGCG	ddPCR	100 bp
	9	NPTII_Rev	ATGGATACTTTCTCGGCAG	ddPCR
	10	NPTII_Probe_HEX	TCTCCTGTCATCTCACCTTGCTC	ddPCR
	1Costa LD, Vinciguerra D, Giacomelli L, Salvagnin U, Piazza S, Spinella K, Malnoy M, Moser C, Marchesi U: Integrated approach for the molecular characterization of edited plants obtained via Agrobacterium tumefaciens‑mediated gene transfer. European Food Research and Technology 2022, 248:289-299.
	2Thilmony, R., et al., Tissue-specific expression of Ruby in Mexican lime (C. aurantifolia) confers anthocyanin accumulation in fruit. Frontiers in Plant Science 13: 945738.

## Sheet: Table S2
	Table S2: Percentage of healthy plantlets obtained with GA3
	Medium	No. of healthy plantlets	Total number of shoots	Percentage of healthy plantlets
	SSM-I w/o GA3	3	14	0.21
	SSM-I 5mg/L GA3	8	16	0.5
	SSM-I 8mg/L GA3	13	23	0.56
	SSM-I 10mg/L GA3	13	18	0.72
	SSM-I 15mg/L GA3	13	20	0.65

## Sheet: Table S3
	Table S3: Measured nptII transgene copy number
	Event No.	CNV	max CNV value	error bar + (max-CNV)	min CNV value	error bar - (CNV-min)
	11	1.04	1.09	0.05	0.98	0.06
	18	1.067	1.106	0.039	1.028	0.039
	22	1.108	1.147	0.039	1.069	0.039
	13	1.121	1.158	0.037	1.085	0.036
	12	1.92	2.27	0.35	1.58	0.34
	9	1.94	2.04	0.1	1.83	0.11
	14	1.99	2.06	0.07	1.93	0.06
	7	2.13	2.26	0.13	2.01	0.12
	15	2.18	2.28	0.1	2.09	0.09
	21	2.91	3.17	0.26	2.65	0.26
	5	3	3.7	0.7	2.3	0.7
	2	3.84	4.1	0.26	3.58	0.26
	4	4.01	4.14	0.13	3.89	0.12
	17	4.76	5.12	0.36	4.41	0.35
	16	5	5.5	0.5	4.5	0.5
	1	14.8	16.9	2.1	12.7	2.1
	3	15.1	18.9	3.8	11.3	3.8
	10	50	55	5	45	5
