# Supplementary material for: Harnessing embryogenic cell suspension culture for Agrobacterium-mediated transformation of microvine
Source: Research Square preprint supplement (doi:10.21203/rs.3.rs-7661205/v1), 2025-09-26
Supplement: Supplementary file 1 [file e84b3a30e1c618613fbf9b39.pdf]

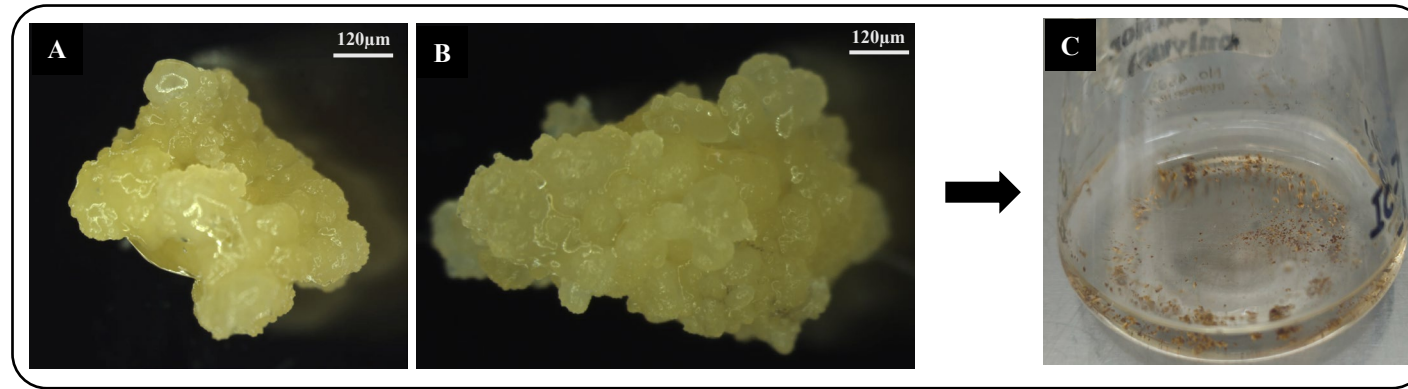

**Figure S1 Undesired part of callus for suspension culture initiation. A & B** Compact pieces of callus that produce a non-embryogenic browning suspension culture. **C** Browning of non embryogenic culture within one month of culture initiation.

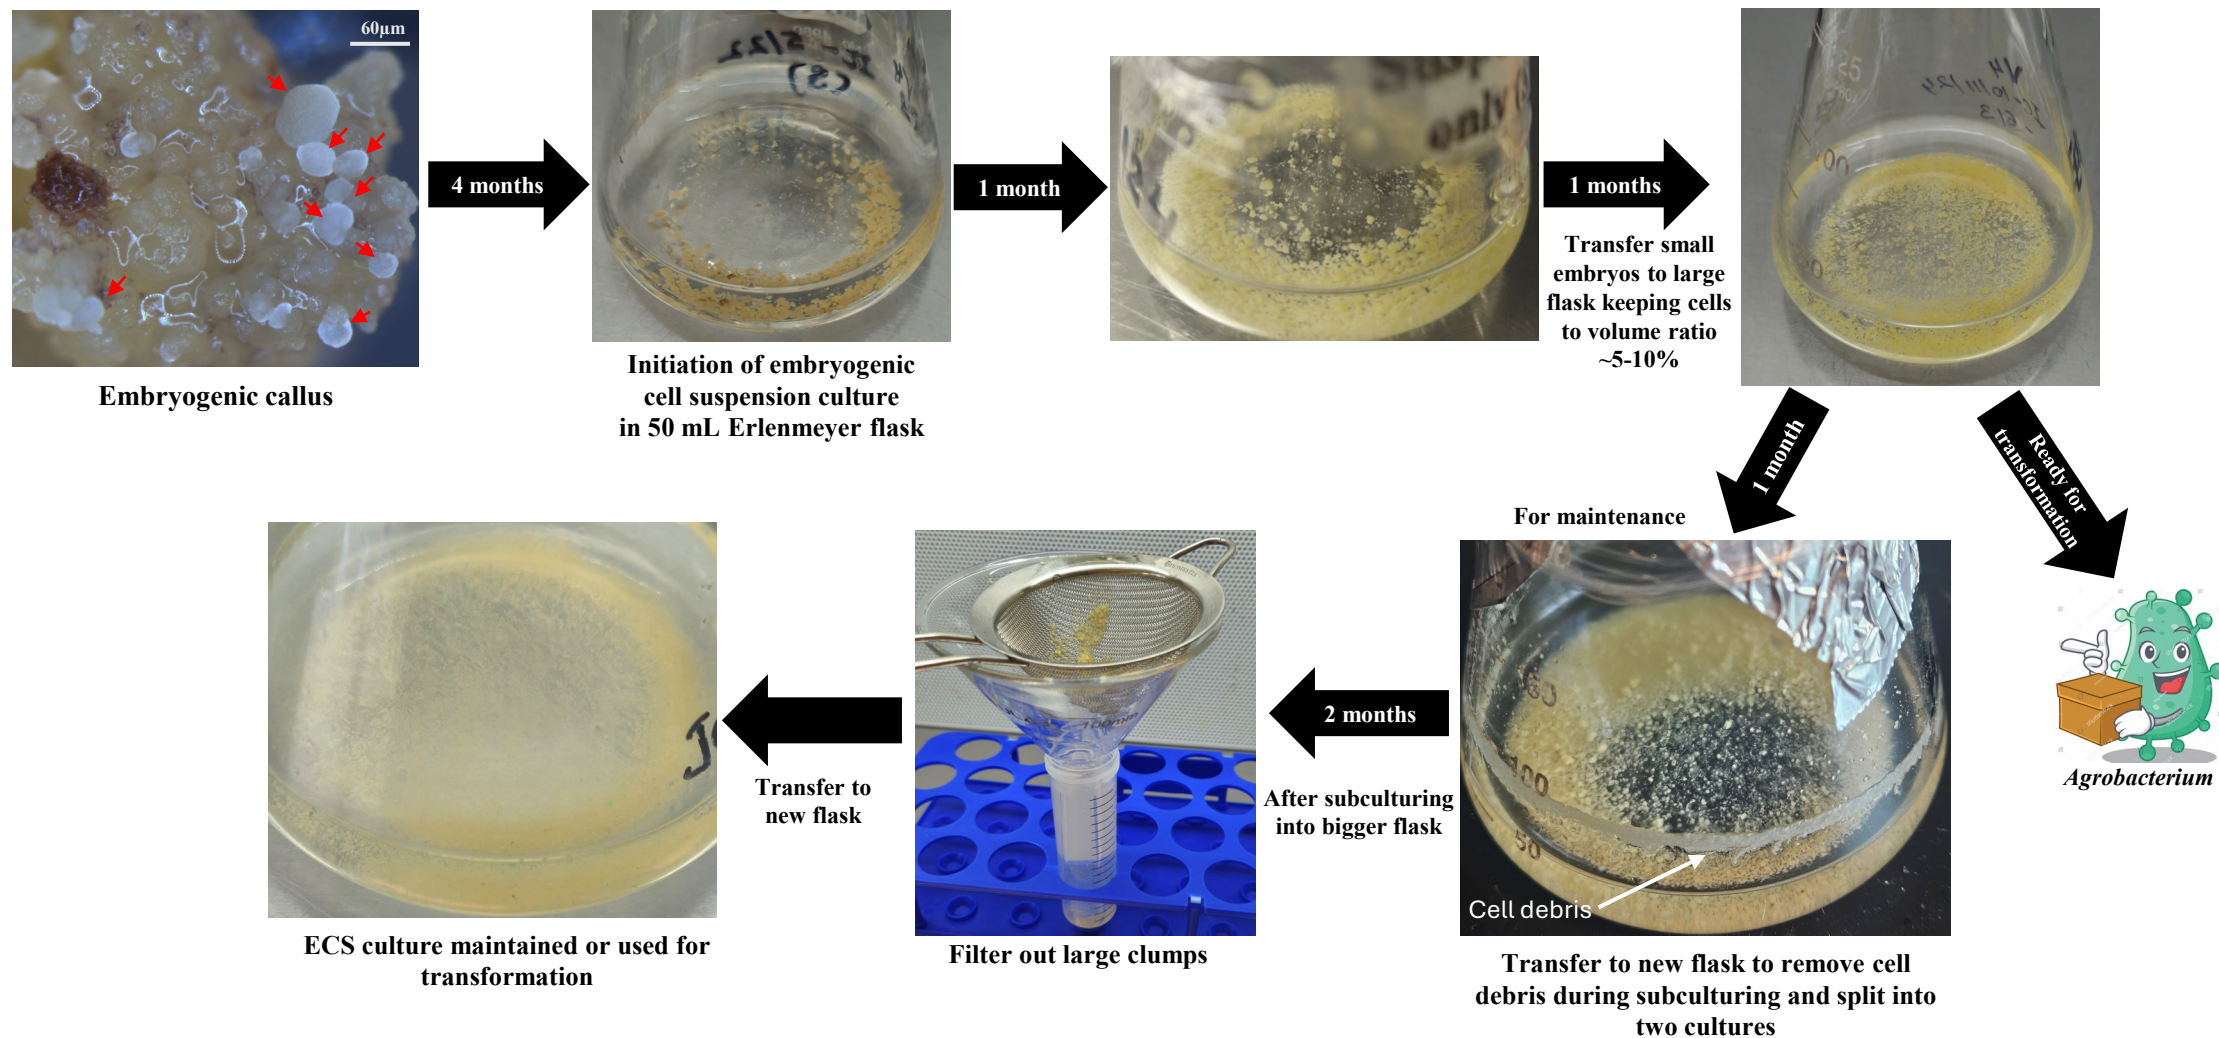

**Figure S2: ECS establishment and maintenance**



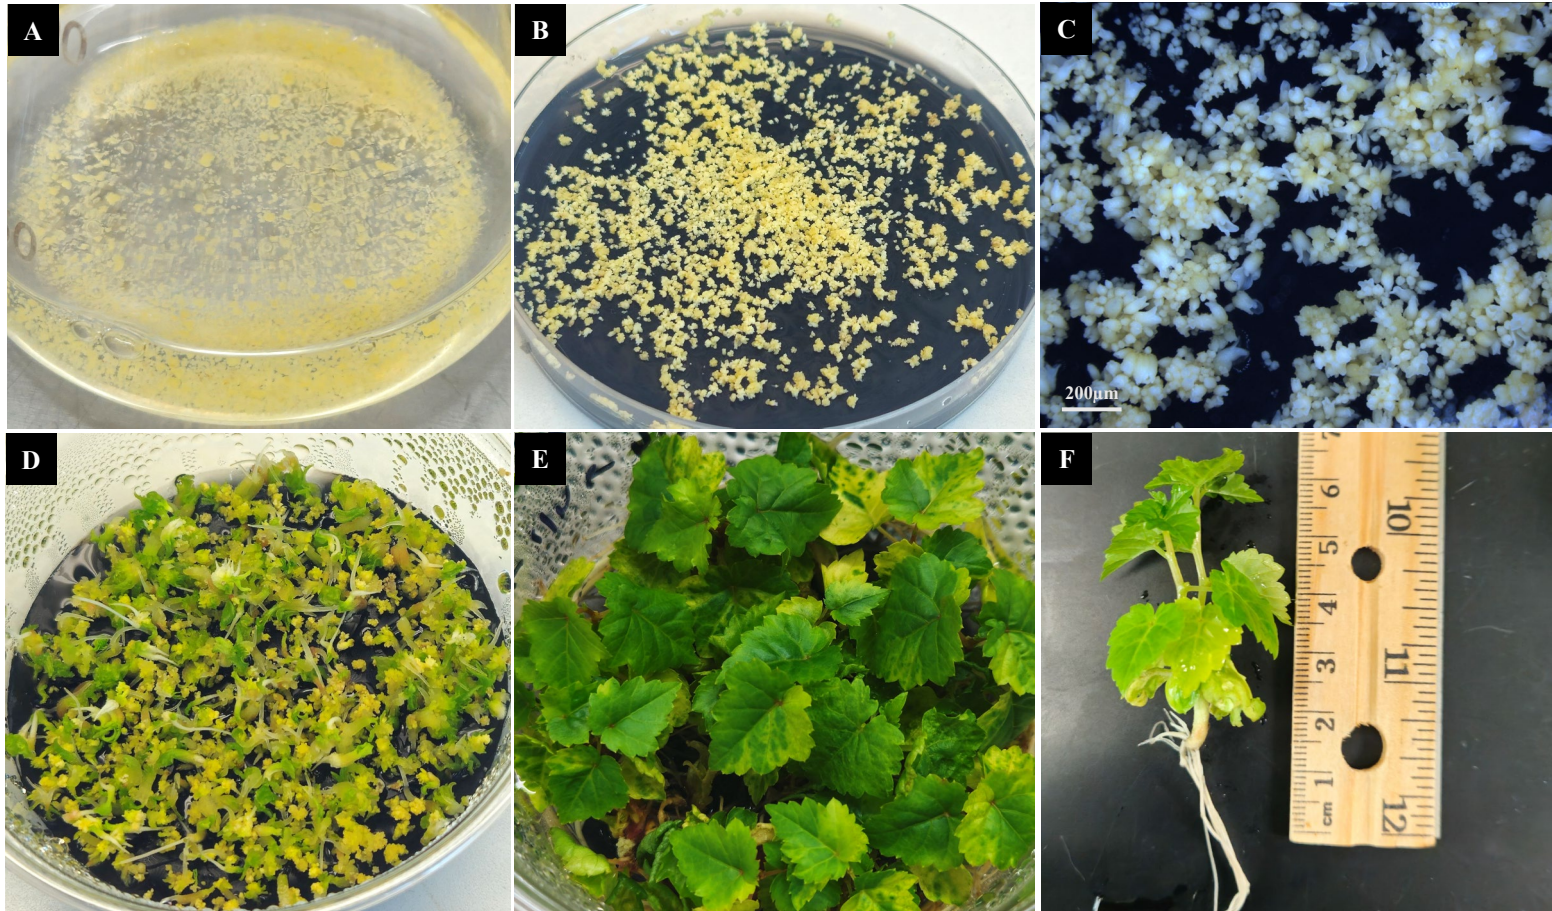

**Figure S3 Development of microvine plants from non-transformed ECS to check regeneration.** **A** Embryogenic cell suspension culture. **B** Suspension cells (~1 mL) 50 days post on EDM semi-solid media. **C** Magnified view of somatic embryos. **D** Growth of mature somatic embryos 15 days after subculturing on SSM medium. **E** Growing plantlets 20 days after subculturing on SSM-I. **F** A regenerated plant ready for transfer to soil.

**SSM-I (no GA<sub>3</sub>)**

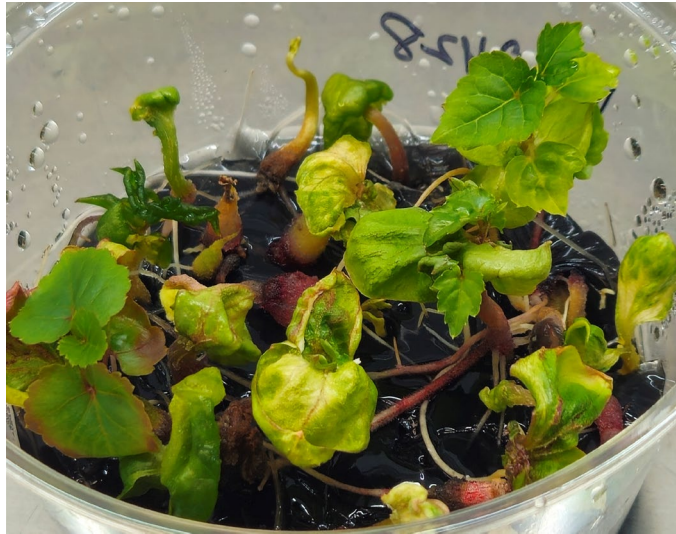

**SSM-I + GA<sub>3</sub> (10 mg/L)**

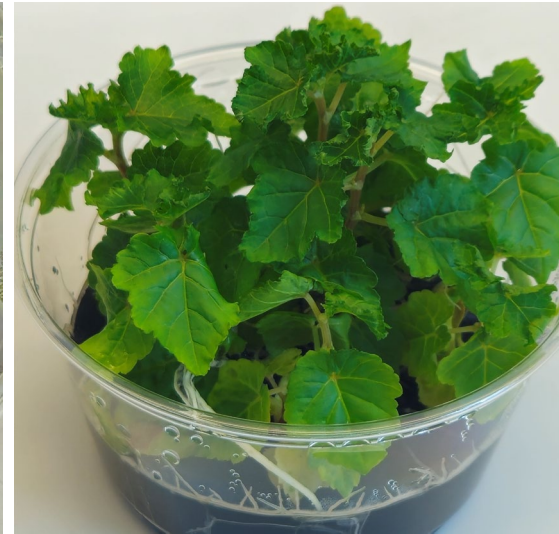

**Figure S4 Transgenic plant development improves with the addition of GA<sub>3</sub>.**



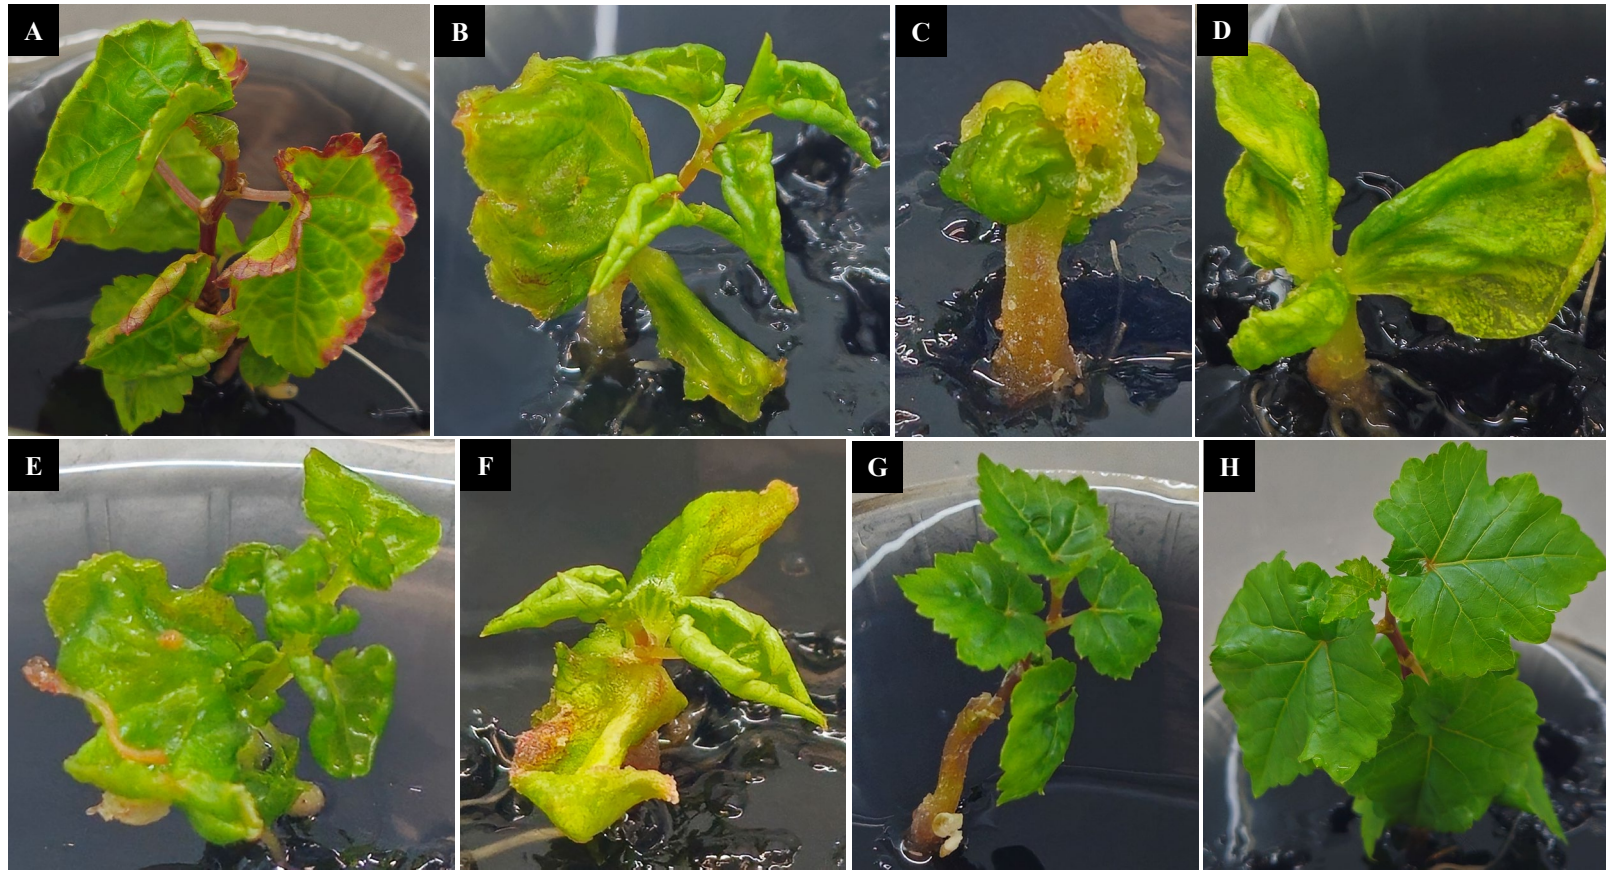

**Figure S5** A-F Transgenic shoots showing abnormal morphology and growth. **G** and **H** Normally growing shoots.
