# Supplementary material for: Harnessing embryogenic cell suspension culture for Agrobacterium-mediated transformation of microvine
Source: Research Square preprint supplement (doi:10.21203/rs.3.rs-7661205/v1), 2025-09-26
Supplement: Supplementary file 2 [file 2bde25f826e7f5b12ea066f3.xlsx]

## Sheet: PIV for callus initiation
	PIV (For callus initiation) 1 L:
	Add 800 ml ddH2O and a stir bar to a 1 L bottle.
	Then add:
	Ingredient	Amount
	10X NN macronutrients	100 ml
	Murashige & Skoog (MS) Micronutrient Salt Base 100X	5 ml
	1000X Gamborg's vitamin powder	1 ml
	2,4-D 1 mM	9 ml
	BAP 1 mM	8.9 ml
	Sucrose	60 g
	Adjust the pH to appx. 5.7 with 0.1 to 1 N KOH, then make up to ~1000 ml volume.
	Add 3 g phytagel.
	Autoclave.

## Sheet: CIM
	CIM (for callus proliferation and maintenance) – 1L
	Add 800 ml ddH2O and a stir bar to a 1 L bottle.
	Then add:
	Ingredient	Amount
	Murashige & Skoog (MS) Micronutrient Salt Base 100X	5 ml
	1000X AA+ mix	10 ml
	Gamborg's Vitamin mix 1000X	1 ml
	2,4-D 1 mM	5 ml
	BAP 1 mM	1 ml
	Murashige & Skoog (MS) Macronutrient Salt Base	4.23 g
	Casein enzymatic hydrolysate	1 g
	Sucrose	30 g
	Adjust the pH to appx. 5.8 with 0.1 to 1 N KOH, then make up to 1000 ml volume.
	Add 3 g phytagel.
	Autoclave.

## Sheet: Suspension Media
	Suspension Media (suspension initiation and maintenance) – 1L
	Add 800 ml ddH2O and a stir bar to a 1 L bottle.
	Then add:
	Ingredient	Amount
	Murashige & Skoog (MS) Micronutrient Salt Base 100X	5 ml
	1000X AA mix	10 ml
	Gamborg's Vitamin mix 1000X	1 ml
	2,4-D 1 mM	5 ml
	BAP 1 mM	1 ml
	Murashige & Skoog (MS) Macronutrient Salt Base	4.23 g
	Casein enzymatic hydrolysate	1 g
	Sucrose	30 g
	Adjust the pH to appx. 5.8 with 0.1 to 1 N KOH, then make up to 1000 ml volume.
	Autoclave and allow to cool to about 55°C-65°C.
	Then add 250 µl zeatin (1 mg/ml stock).
	Check for contamination by incubating 1 ml medium in vial at 37°C and 28°C before use.
	Store at 4°C.

## Sheet: CCM
	CCM (Co-cultivation medium): 200ml
	Add 150 ml ddH2O and a stir bar to a 500 mL bottle.
	Then add:
	Ingredient	Amount
	Lloyd & McCown Woody Plant Basal Medium with Vitamins	2.41 g
	Sucrose	12 g
	Adjust the pH to appx. 6.2 with 0.1 to 1 N KOH, then make up to 200 ml volume.
	Autoclave.
	Immediately before use, add acetosyringone to a final concentration of 400 µM.

## Sheet: EDM
	EDM (Embryo development and maturation medium) 1 L
	Add 800 ml ddH2O and a stir bar to a 1 L bottle.
	Then add:
	Ingredient	Amount
	Lloyd & McCown Woody Plant Basal Medium with Vitamins	2.41 g
	Sucrose	60 g
	Adjust the pH to appx. 6.2 with 0.1 to 1 N KOH, then make up to ~960 ml volume.
	Then add:
	Ingredient	Amount
	1.0% bacto agar	10 g
	0.25% activated charcoal	2.5 g
	Autoclave and allow to cool to about 55°C-65°C.
	Add sterile liquid ingredients in the laminar flow hood as needed, then pour.
	For ECS culture after transformation
	Ingredient	Amount
	NOA 1 mM	10 ml
	BAP 1 mM	1 ml
	IAA 1 mM	20 ml
	Cefotaxime 250mg/ml	1 ml
	Selection antibiotic as needed	-

## Sheet: SSM 
	SSM (Suspension shooting medium)
	Add 800 ml ddH2O and a stir bar to a 1 L bottle.
	Then add:
	Ingredient	Amount
	Lloyd & McCown Woody Plant Basal Medium with Vitamins	2.41 g
	Sucrose	20 g
	BAP 1 mM	1 ml
	Adjust the pH to appx. 6.0 with 0.1 to 1 N KOH, then make up to ~980 ml volume.
	Then add:
	Ingredient	Amount
	Phytagel	3 g
	0.25% activated charcoal	1 g
	Autoclave and allow to cool to about 55°C.
	Then add:
	Ingredient	Amount
	IAA 1 mM	500 µl
	GA3(5 mg/ml stock)	1 ml
	Cef250	1 ml
	Selection antibiotic as needed	-

## Sheet: SSM-I
	SSM-I ( for shoot development )
	Add 800 ml ddH2O and a stir bar to a 1 L bottle.
	Then add:
	Ingredient	Amount
	Lloyd & McCown Woody Plant Basal Medium with Vitamins	2.41 g
	Sucrose	20 g
	Adjust the pH to appx. 6.0 with 0.1 to 1 N KOH, then make up to ~980 ml volume.
	Then add:
	Ingredient	Amount
	Phytagel	3 g
	0.25% activated charcoal	1 g
	Autoclave and allow to cool to about 55°C.
	Then add:
	Ingredient	Amount
	GA3 (5 mg/ml stock)	2 ml
	Cef250	1 ml

## Sheet: Hormone and macro stocks
	Vitamin and hormone stocks for grape media
	1000X AA+ vitamin mix, 100 ml
	Ingredient	wt (g)
	Nicotinic acid	0.36
	D-pantonthenic acid	0.04
	Biotin	0.0004
	L-glutamic acid	40
	phenylalanine	0.4
	glycine	0.08
	Filter sterilize and store at 4°C wrapped in foil.
	NN macronutrients (10X stock, 1 L)
	Ingredient	wt (g)
	Ammonium Nitrate (NH4NO3)	0.72
	Potassium Nitrate (KNO3)	0.95
	Calcium Chloride, Anhydrous (CaCl2.2H2O)	0.44
	Magnesium Sulfate, Anhydrous (MgSO4.7H2O)	0.18
	Potassium Phosphate, Monobasic (KH2PO4)	0.17
	Filter sterilize and store at 4°C wrapped in foil.
	1000x Murashige & Skoog (MS) Micronutrient Salt Base. 0.1 g/L working concentration
	Dissolve one 5 g packet into 50 ml water. Filter sterilize.
	1000X Gamborg's vitamin powder, 100 ml
	11.2 g in 100 ml water, filter sterilize.
	1 mM 2,4-D (2,4-Dichlorophenoxyacetic acid) stock
	Dissolve 44.2 mg in about 1 ml 1M NaOH. Add water and heat to completely dissolve.
	Make up to 200ml. Sterile filter, aliquot, and store in -20°C.
	1 mM BAP (6-Benzylaminopurine) stock
	Dissolve 45.04 mg in about 1ml of 1M NaOH. Add water and make up to 200 ml.
	Sterile filter, aliquot, and store in -20°C.
	1 mM NOA (2-Naphthoxyacetic acid) stock
	Dissolve 40.44 mg in about 1 ml of 1M NaOH. Add water and heat to completely dissolve.
	Make up to 200ml. Sterile filter, aliquot, and store in -20°C.
	1 mM IAA (Indole-3-acetic acid) stock
	Dissolve 35.0 mg in about 1ml of 1M NaOH. Add water and make up to 200ml.
	Sterile filter, aliquot, and store in -20°C.
	1 mM NAA (Naphthaleneacetic Acid) stock
	Dissolve 9.3 mg in about 1ml of 1M NaOH. Add water and make up to 50ml.
	Sterile filter, aliquot, and store in -20°C.
	5 mg/ml GA3 (Gibberellin A3) stock
	Dissolve 500 mg in 100 ml 95% ethanol. Aliquot and store in -20°CC.
	1 mg/ml Zeatin stock
	Dissolve 100 mg in about 1 ml of 1M NaOH. Add water and make up to 100ml.
	Sterile filter, aliquot, and store in -20°C.
